# Supplementary material
Source: publisher figshare collection journal article supplement (https://karger.figshare.com/ndownloader/files/8956402)
Supplement: Supplementary file 1 [file 8956402]

## Erratum

---

In the article by Bedaiwy MA et al., entitled 'Laparoscopic single-site surgery for benign ovarian cystectomies' [Gynecol Obstet Invest 2015;79:179-83, DOI: 10.1159/000367659], the following author has been misspelled: Nickles-Fader A. It should be listed as Fader AN.
